# Supplementary material
Source: PubMed Central journal article supplement (PMC10448363)
Supplement: jamasurg-e233673-s002.pdf [file jamasurg-e233673-s002.pdf]

## Data Sharing Statement

Chen. Risk-Adjusted Cumulative Sum for Early Detection of Hospitals With Excess Perioperative Mortality. *JAMA Surg.* Published August 23, 2023.

doi:10.1001/jamasurg.2023.3673

### Data

**Data available:** No
